# Supplementary material
Source: PubMed Central journal article supplement (PMC9239231)

A

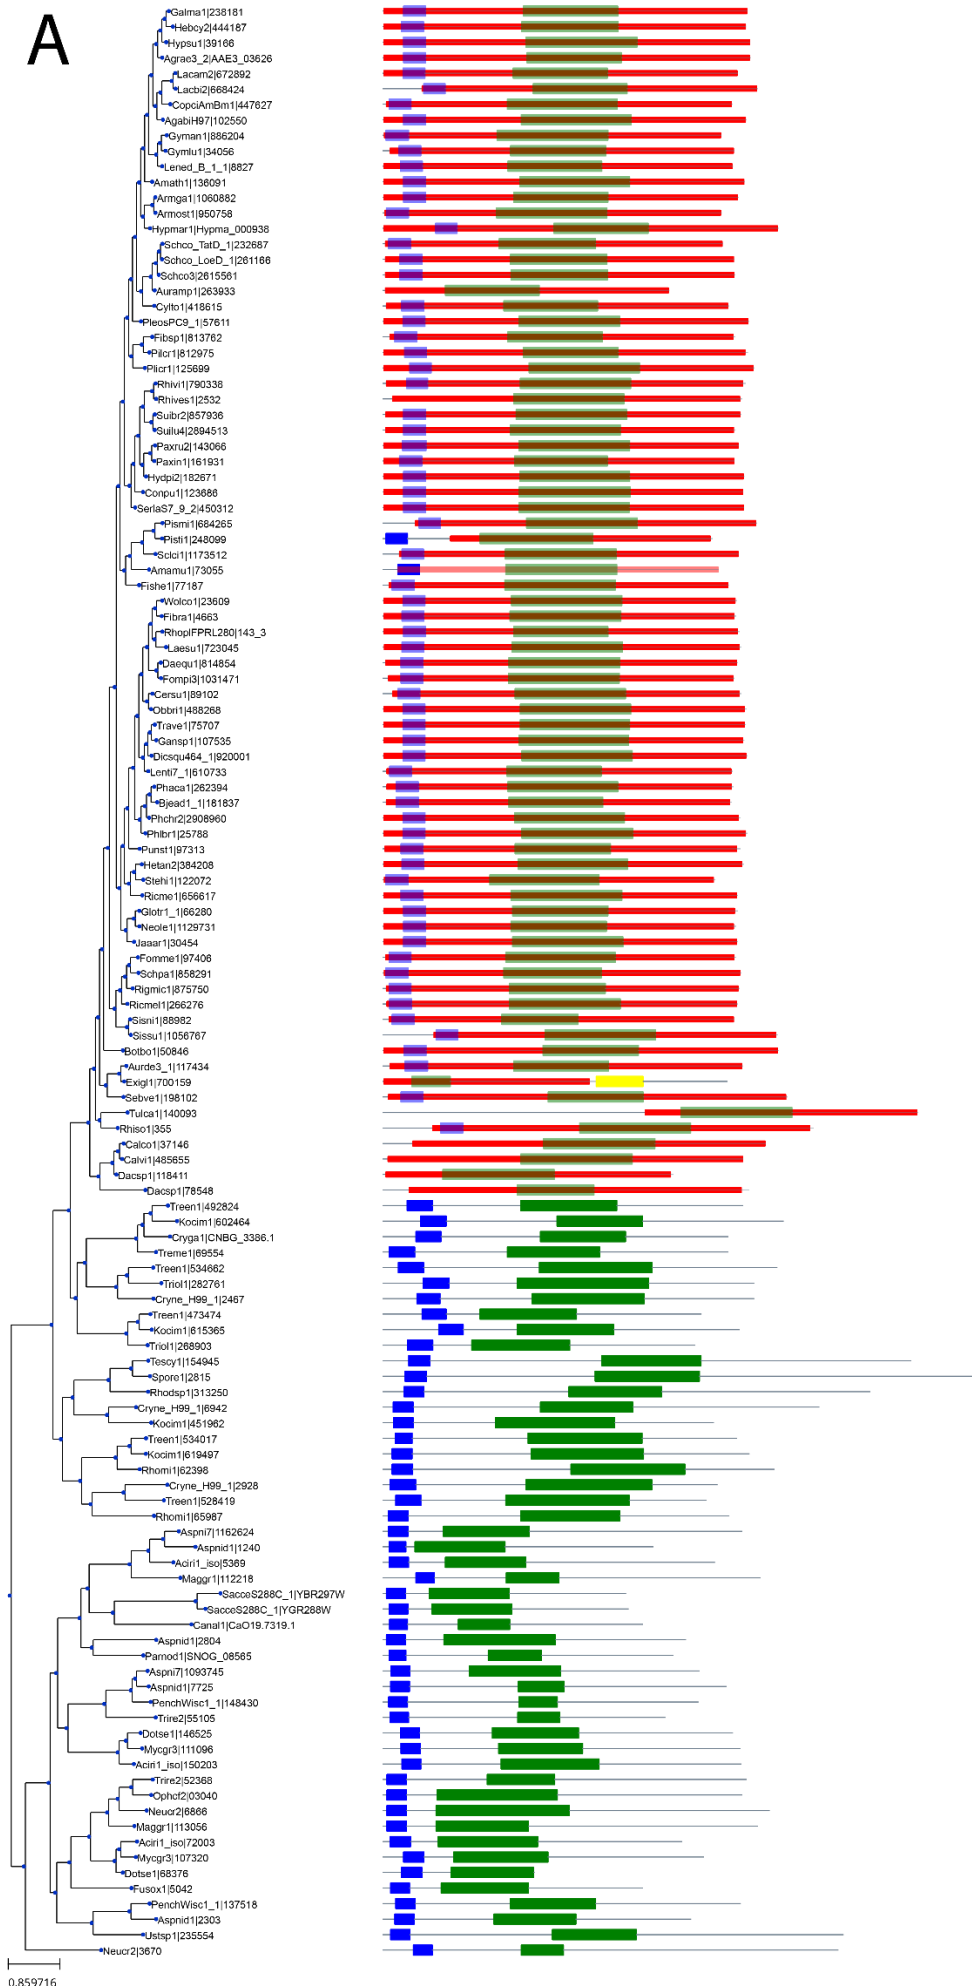

0.859716

B

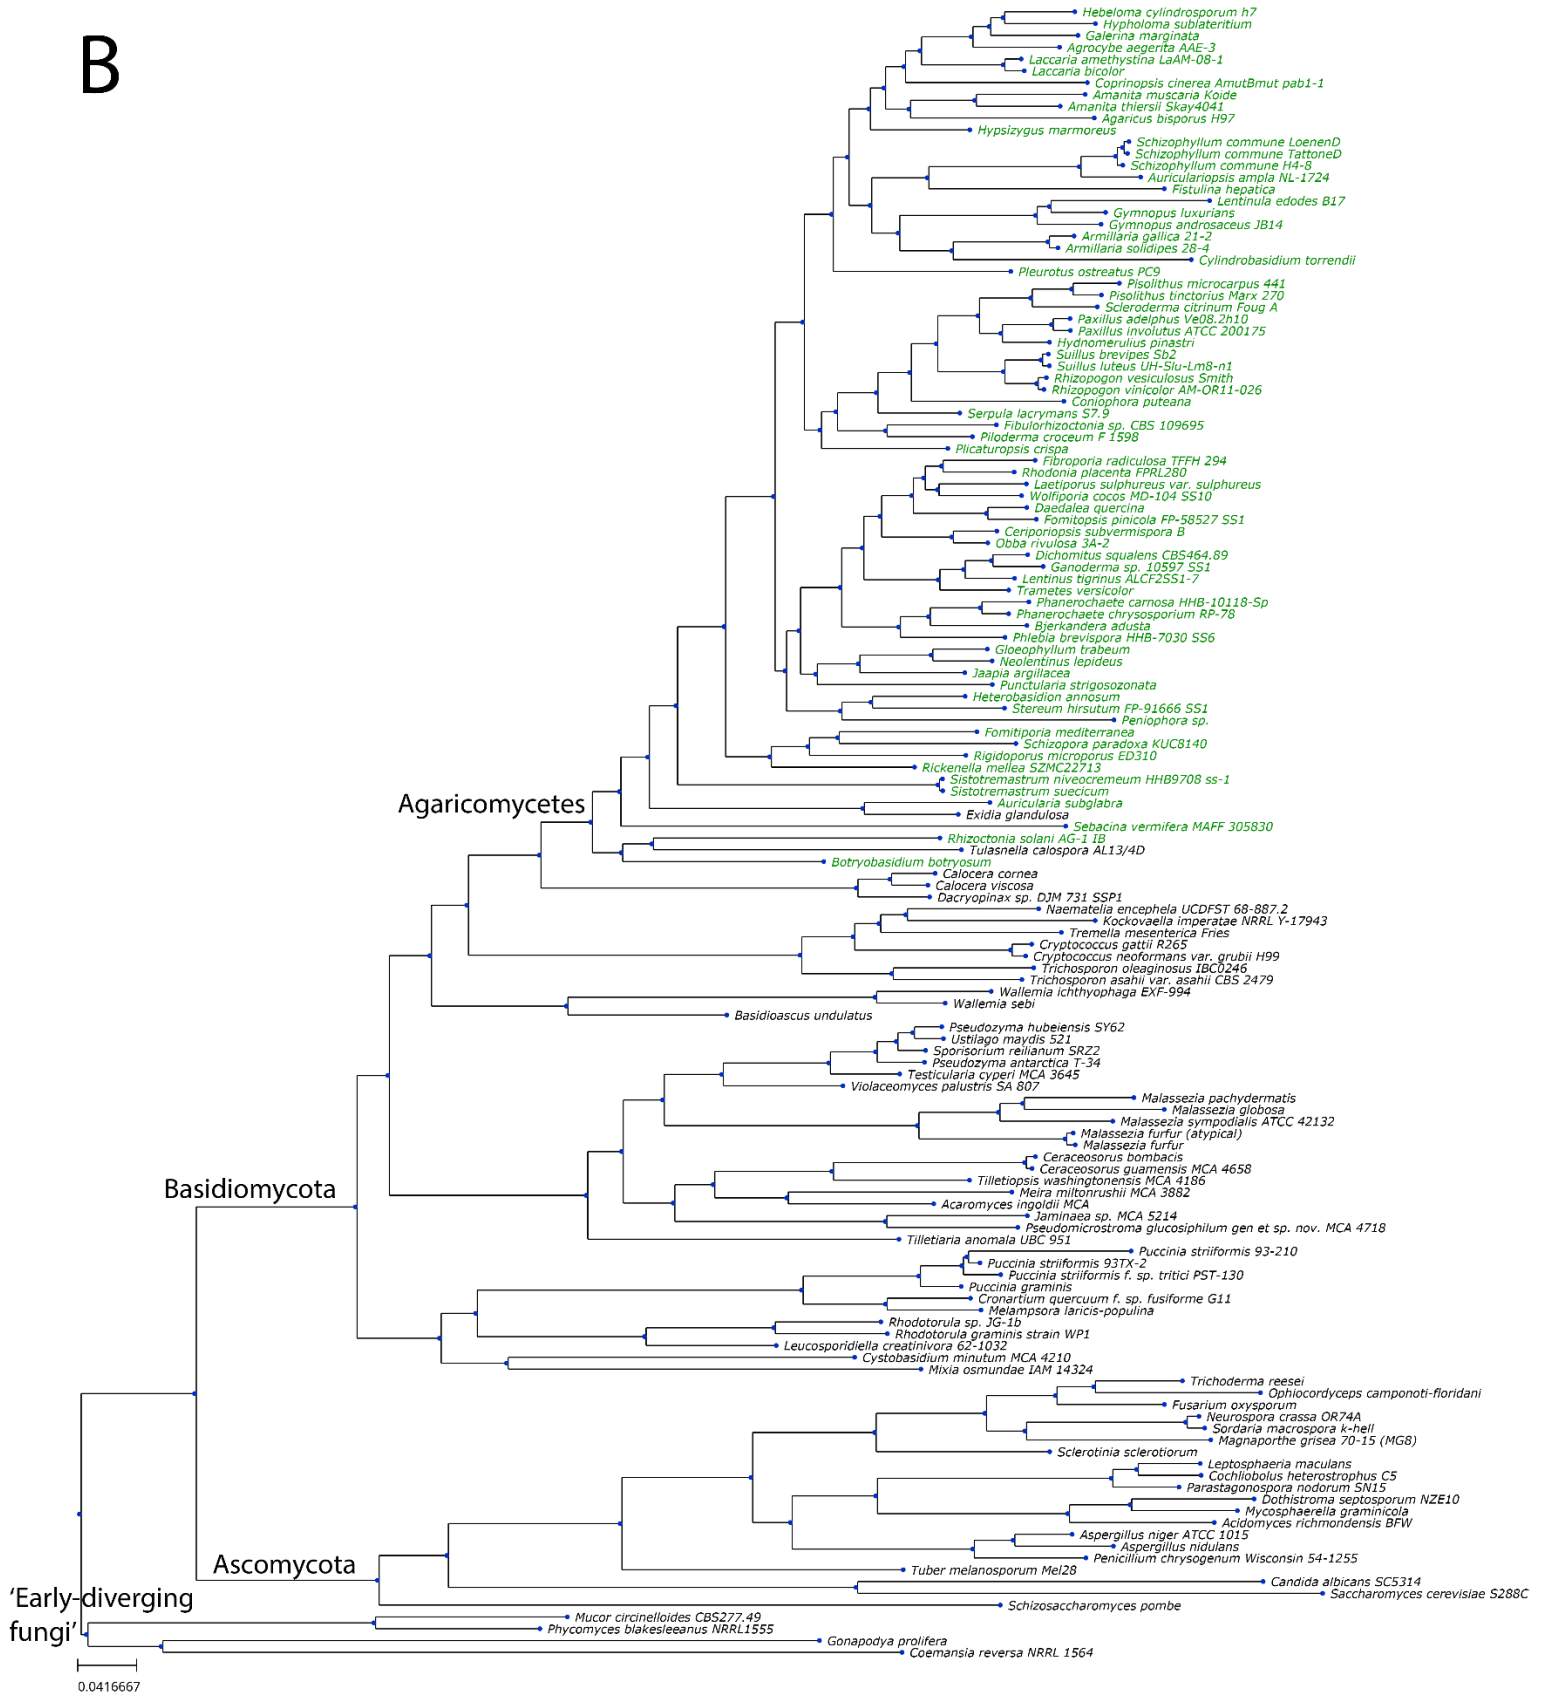

Supplement: mbio.00628-22-sf002.pdf [file mbio.00628-22-sf002.pdf]
